## COMMENTS AND RESPONSES

### **PPAR $\gamma$ Variant Influences Angiographic Outcome and 10-Year Cardiovascular Risk in Male Symptomatic Coronary Artery Disease Patients**

Response to Schneider et al.

The effects of peroxisome proliferator-activated receptor (PPAR) $\gamma$  are largely unknown, and studies of genetic variation are one approach to confirm and estimate its impact on disease in humans. Vasculoprotective effects have been observed preclinically with small-molecule stimulation of the PPAR $\gamma$  pathway. Therefore, it constitutes a potential target of secondary prevention to further reduce cardiovascular risk in patients with manifest vascular disease. Other than our current report, there is no evidence on the impact of genetic variation in PPAR $\gamma$  on cardiovascular prognosis in a secondary prevention setting. Hence, we fully share the opinion of Schneider et al. (1) that the current data are not generalizable and only pertain to patients with manifest vascular disease. We greatly encourage further studies on the role of PPAR $\gamma$  in recurrent cardiovascular events and progression of atherosclerosis. Our conclusion therefore remains that our long-term findings in patients with manifest coronary artery disease (CAD) support an important role of PPAR $\gamma$  in determining vascular risk (2).

Regarding the first comment related to the metabolic profile of the REGRESS (Regression Growth Evaluation Statin Study) population, it is important to realize that known type 1 or type 2 diabetes at baseline was an exclusion criterion for the

study and there were no data available on insulin sensitivity and insulin excretion. Lack of significant differences in fasting glucose and BMI among genotypes is therefore easily understood.

A second comment relates to confounding in our study. Confounding factors by definition affect both the determinant (genotype) and the outcome (clinical end point). As a concept, when observing the relation between genotype and clinical outcome, confounding is therefore difficult to imagine, except if as a selection mechanism. We therefore did not correct for either smoking or age. As described, all multivariate models have been intended to explore potential intermediate factors.

A third comment relates to previous reports of cross-sectional analyses of the relation between Pro12Ala genotype and angiographic end points such as the number of vessels diseased. The discrepancy of our data with the report by von Eynatten et al. (3), using the severity score and extent score assessments of CAD, is intriguing. The fact that no baseline characteristics of the 171 study participants were given in that report makes it impossible to provide an explanation underlying this discrepancy. Our current data from REGRESS show that the number of coronary vessels diseased does not vary by Pro12Ala genotype group, and—contrary to the suggestion made by Schneider et al. (1)—these data are fully in keeping with the report by Rhee et al. (4). Furthermore, it is important to note that we assessed the extent of CAD in REGRESS by means of quantitative coronary angiography. This robust and highly standardized measure of atherosclerosis has been widely employed in angiographic clinical trials of atherosclerosis progression. The quantitative coronary angiography analysis uncovered less widespread CAD in carriers of the 12Ala allele of PPAR $\gamma$ .

JAKUB J. REGIELI, MD<sup>1,2</sup>  
J. WOUTER JUKEMA, MD<sup>3,4,5</sup>  
PIETER A. DOEVENDANS, MD<sup>2</sup>  
AEILKO H. ZWINDERMAN, PHD<sup>6</sup>  
YOLANDA VAN DER GRAAF, MD<sup>1</sup>  
JOHN J. KASTELEIN, MD<sup>7</sup>  
DIEDERICK E. GROBBEE, MD<sup>1</sup>

From the <sup>1</sup>Julius Center for Health Sciences and Primary Care, University Medical Center Utrecht, Utrecht, the Netherlands; the <sup>2</sup>Department of Cardiology, University Medical Center Utrecht, Utrecht, the Netherlands; the <sup>3</sup>Department of Cardiology and Einthoven Laboratory of Experimental Vascular Medicine, Leiden University Medical Center, Leiden, the Netherlands; the <sup>4</sup>Interuniversity Cardiology Institute of the Netherlands, Utrecht, the Netherlands; the <sup>5</sup>Durrer Institute for Cardiogenetic Research, Amsterdam, the Netherlands; the <sup>6</sup>Department of Clinical Epidemiology and Biostatistics, Academic Medical Center, Amsterdam, the Netherlands; and the <sup>7</sup>Department of Vascular Medicine, Academic Medical Center, Amsterdam, the Netherlands.

Corresponding author: Diederick E. Grobbee, d.e.grobbee@umcutrecht.nl.

DOI: 10.2337/dc09-0525

© 2009 by the American Diabetes Association. Readers may use this article as long as the work is properly cited, the use is educational and not for profit, and the work is not altered. See <http://creativecommons.org/licenses/by-nc-nd/3.0/> for details.

**Acknowledgments**—J.W.J. is an established clinical investigator of the Netherlands Heart Foundation (2001D032).

Please see ref. 2 for a list of the potential conflicts of interest relevant to this article.

#### References

1. Schneider JG, Schiekofer S, von Eynatten M, Dugi KA. PPAR $\gamma$  variant influences angiographic outcome and 10-year cardiovascular risk in male symptomatic coronary artery disease patients (Letter). *Diabetes Care* 2009;32:e75. DOI:10.2337/dc09-0393
2. Regieli JJ, Jukema JW, Doevendans PA, Zwinderman AH, van der Graaf Y, Kastelein JJ, Grobbee DE. PPAR $\gamma$  variant influences angiographic outcome and 10-year cardiovascular risk in male symptomatic coronary artery disease patients. *Diabetes Care* 2009;32:839–844
3. von Eynatten M, Schneider JG, Humpert PM, Kreuzer J, Kuecherer H, Katus HA, Nawroth PP, Dugi KA. Serum adiponectin levels are an independent predictor of the extent of coronary artery disease in men. *J Am Coll Cardiol* 2006;47:2124–2126
4. Rhee EJ, Kwon CH, Lee WY, Kim SY, Jung CH, Kim BJ, Sung KC, Kim BS, Oh KW, Kang JH, Park SW, Kim SW, Lee MH, Park JR. No association of Pro12Ala polymorphism of PPAR-gamma gene with coronary artery disease in Korean subjects. *Circ J* 2007;71:338–342
